# Supplementary material for: Semi-Rational Design of L-Isoleucine Dioxygenase Generated Its Activity for Aromatic Amino Acid Hydroxylation
Source: MDPI journal article supplement (doi:10.3390/molecules28093750), 2023-04-27
Supplement: s1 [file s1]

# Supplementary Information

## Semi-Rational Design of L-Isoleucine Dioxygenase Generated Its Activity for Aromatic Amino Acid Hydroxylation

Jianhong An <sup>1,2,3</sup>, Jiaojiao Guan <sup>1</sup> and Yao Nie <sup>1,2,\*</sup>

<sup>1</sup> School of Biotechnology and Key Laboratory of Industrial Biotechnology, Ministry of Education, Jiangnan University, 1800 Lihu Road, Wuxi 214122, China; ajhbio1978@126.com (J.A.); 15906191696@139.com (J.G.)

<sup>2</sup> International Joint Research Laboratory for Brewing Microbiology and Applied Enzymology, Jiangnan University, 1800 Lihu Road, Wuxi 214122, China

<sup>3</sup> Eye Hospital, Wenzhou Medical University, 270 Xueyuan Road, Wenzhou 325000, China

\* Correspondence: ynie@jiangnan.edu.cn; Tel.: +86-510-85197760; Fax: +86-510-85918201

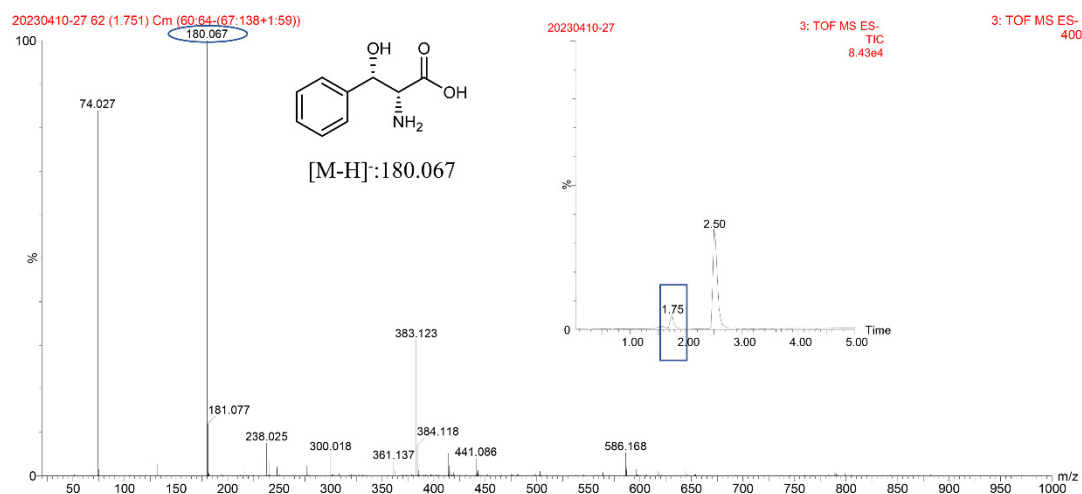

Figure S1. LC-MS analysis of products catalyzed by Y143D with substrate PHE.

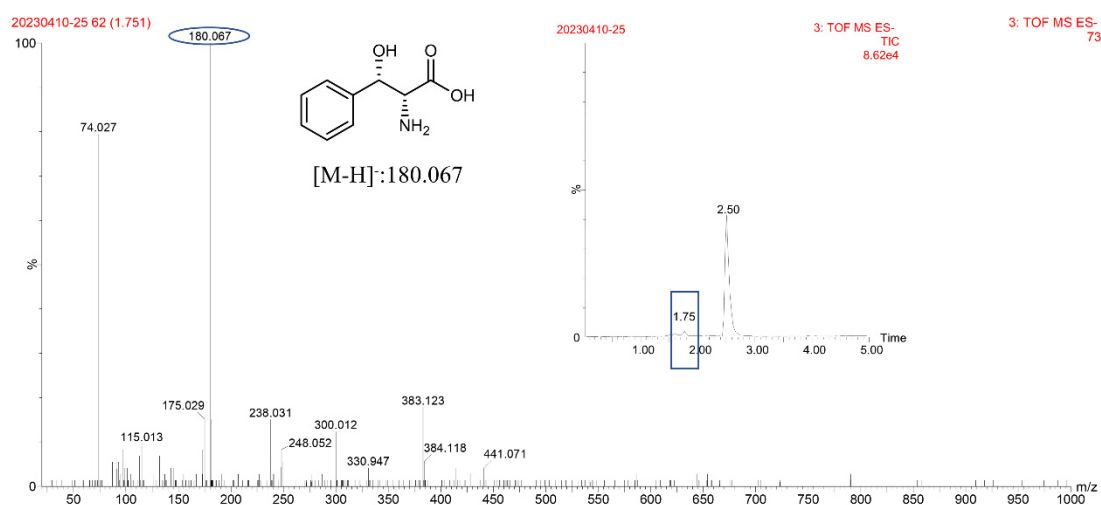

Figure S2. LC-MS analysis of products catalyzed by Y143I with substrate PHE.

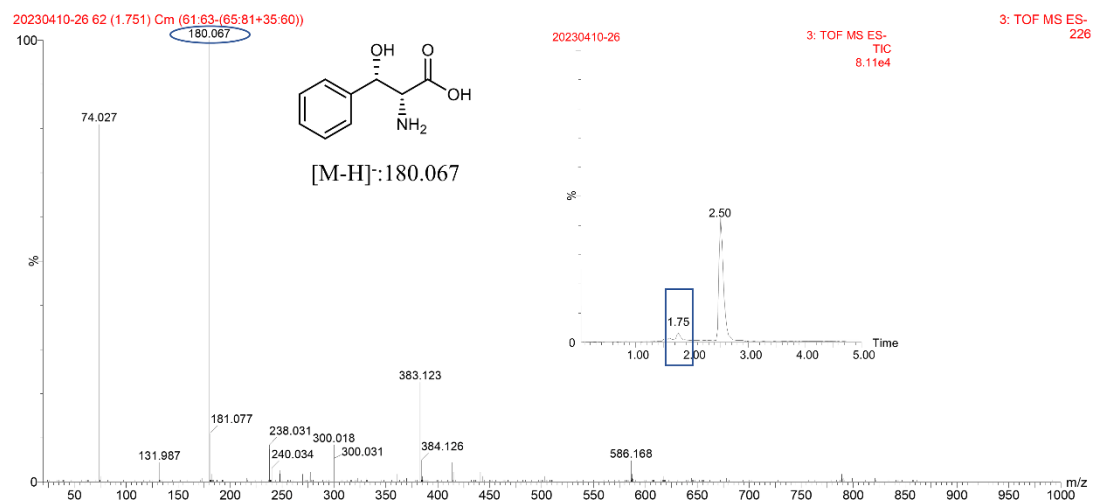

Figure S3. LC-MS analysis of products catalyzed by S153A with substrate PHE.
